# Supplementary material for: An internal filtration effect-based “off–on” probe for fluorescent and visual sensing of formaldehyde
Source: Royal Society of Chemistry journal article supplement (doi:10.1039/d3ay01551c), 2023-12-14
Supplement: d3ay01551c1.pdf [file d3ay01551c1.pdf]

## Supporting information

### An internal filtration effect-based “off-on” probe for fluorescent and visual sensing of formaldehyde

Wanli Fan,<sup>a,\*</sup> Shiwei Yang,<sup>a,\*</sup> Yan Kou,<sup>a</sup> Xiao Wang,<sup>a</sup> Qiling Zhang,<sup>b</sup> and Huijing Tan<sup>c</sup>

\* Corresponding author.

<sup>a</sup> School of Civil Engineering and Architecture, Nanyang Normal University, Nanyang, Henan 473000, China. **E-mail:** wanlifan123@foxmail.com; blankyung@sina.cn

<sup>b</sup> Wusheng County Environmental Monitoring Station, Guang'an, Sichuan 638400, China

<sup>c</sup> College of Environment and Civil Engineering, Chengdu University of Technology, Chengdu, Sichuan 610031, China

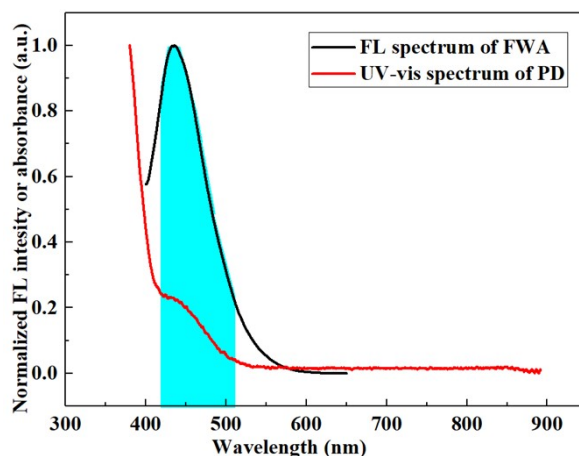

**Fig. S1** The FL emission spectrum of FWA and the UV-Vis absorption spectrum of PD.

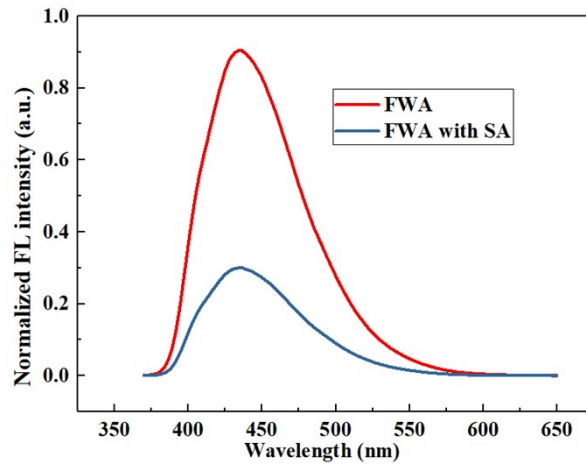

Fig. S2 The normalized FL spectra of FWA and FWA with 0.15 mL of 2% SA.

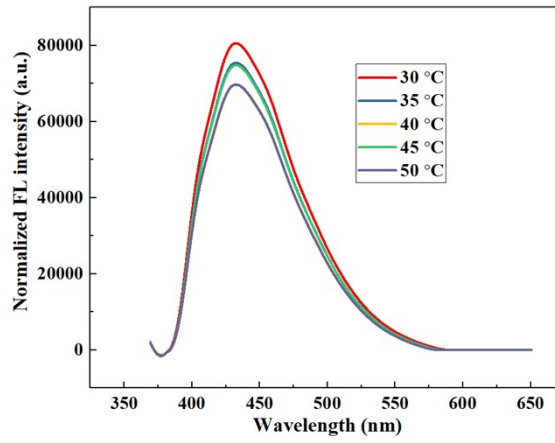

Fig. S3 The FL spectra of FWA after incubating at different temperature for 5 min.

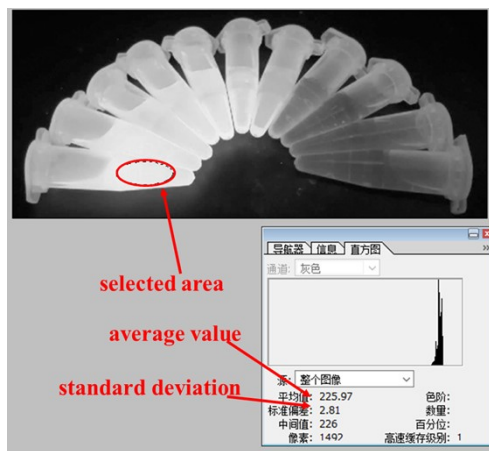

**Fig. S4** The example of the acquirement of brightness value in a selected area by Photoshop 8.0.

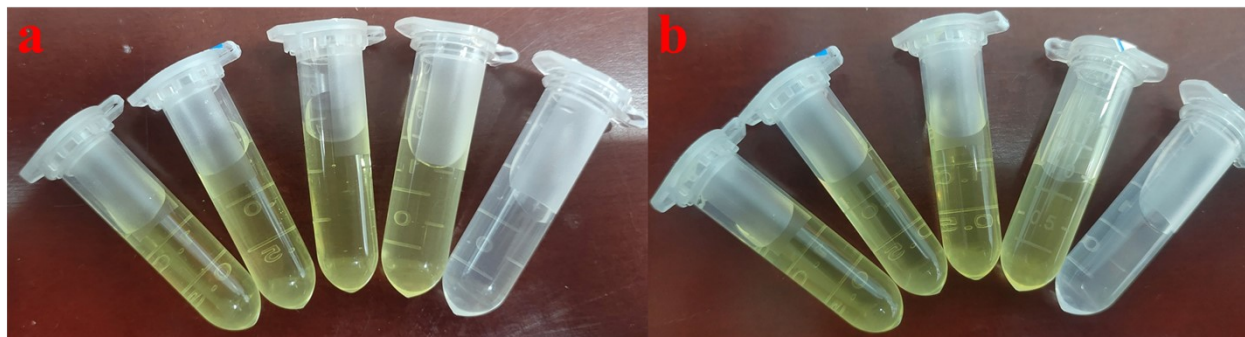

**Fig. S5** The photos of FPD with different analytes after 14 min (a) and 18 h (b), where the samples from left to right were FPD with water, BzH, MDA, GO, and FA, respectively.

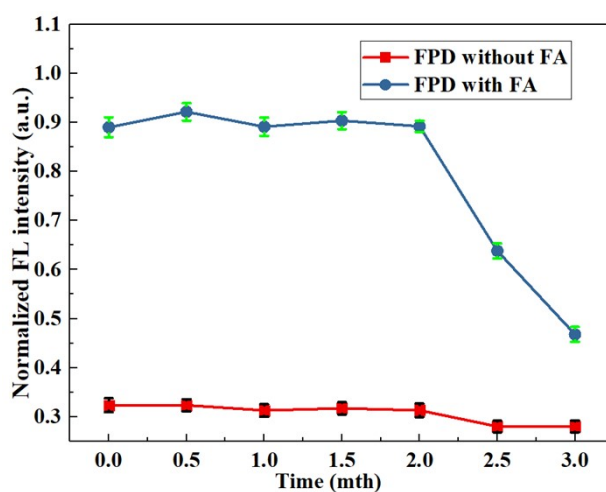

**Fig. S6** The FL intensities of FPD without and with FA after FWA and PD were stored for 0-3 month.

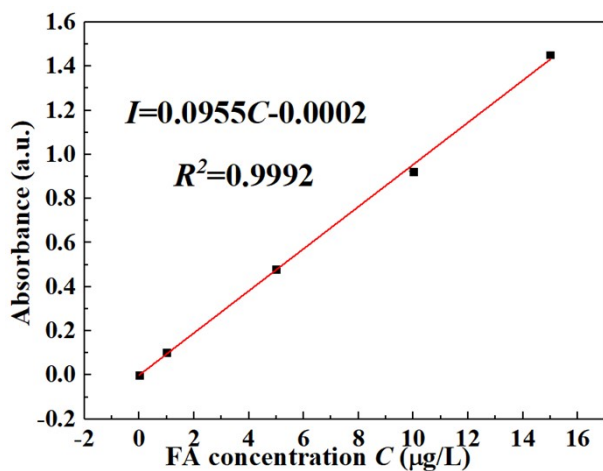

**Fig. S7** The standard curve between the absorption intensity  $I$  and FA concentration  $C$  from 0 to 15  $\mu\text{g/L}$ .

In this work, UV approach was used to verify the proposed method. Briefly, 20% ammonium acetate and 0.4% acetylacetone water solution were mixed in equal volume (solution A). 0.1 mL of 0, 20, 100, 200, and 300  $\mu\text{g/L}$  FA solution, 1 mL of solution A, and 0.9 mL of water were then mixed and incubated in a water bath at 70°C for 10 minutes, respectively. The absorption intensities were recorded at 414 nm, and FA concentrations ( $C$ ) were 0, 1, 5, 10, and 15  $\mu\text{g/L}$ . The standard curve between absorption intensity ( $I$ ) and  $C$  was shown in Fig.S6. The RSD% was found to be less than 0.15%.
